# Supplementary material
Source: Springer Nature journal article supplement (https://www.springermedizin.de/resource/supplementary/12913_2009_1319_MOESM1_ESM.pdf/9527860)
Supplement: MOESM1 [file 9527860]

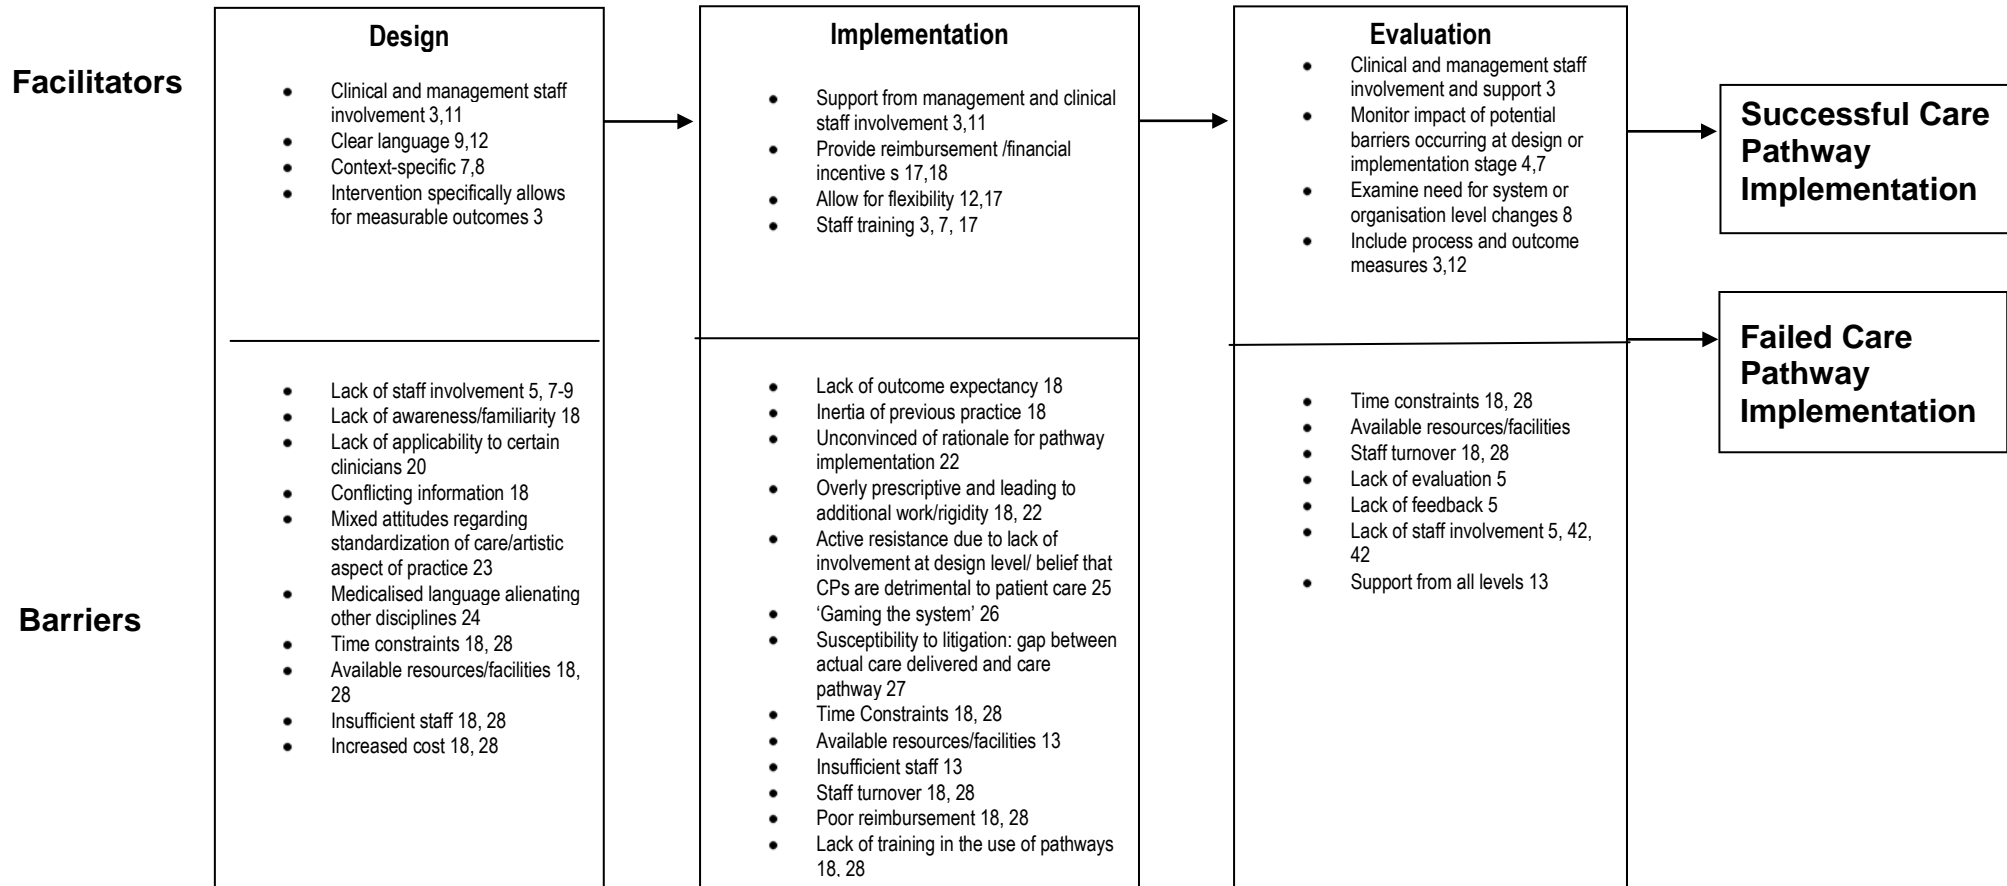

NB. Figure 1 illustrates facilitators and barriers at each stage of the development of a care pathway. Barriers at any stage can stop successful implementation, The numbers shown indicate the relevant references.
